# Supplementary material for: Genetic Interactions of MAF1 Identify a Role for Med20 in Transcriptional Repression of Ribosomal Protein Genes
Source: PLOS journal article supplement (doi:10.1371/journal.pgen.1000112), 2008-07-03

Fig. S4

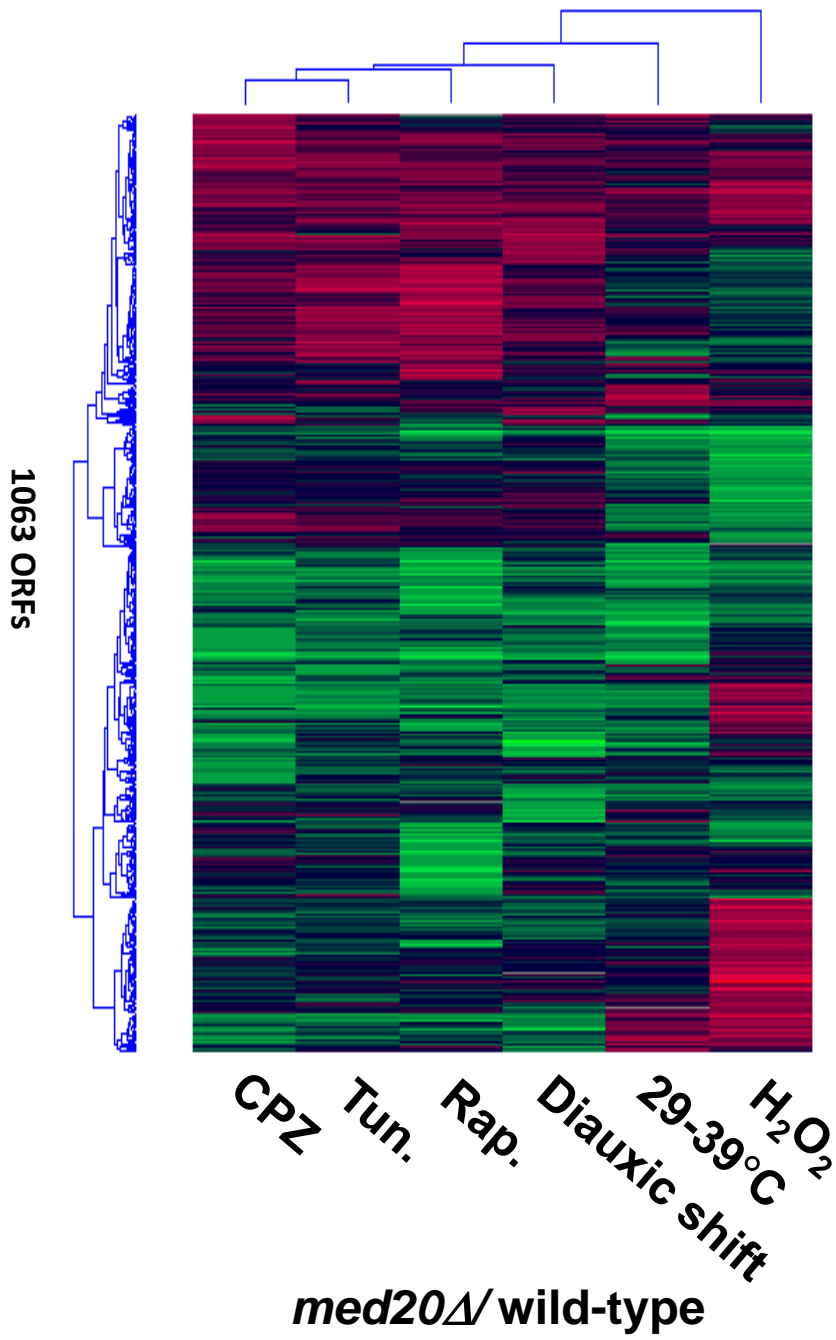

Supplement: S4 (10.1371/journal.pgen.1000112.s004) [file journal.pgen.1000112.s004]
